# Supplementary material for: Effects of Conjugated Linoleic Acid Supplementation on the Expression Profile of miRNAs in Porcine Adipose Tissue
Source: MDPI journal article supplement (doi:10.3390/genes8100271), 2017-10-13
Supplement: s1 [file s1]

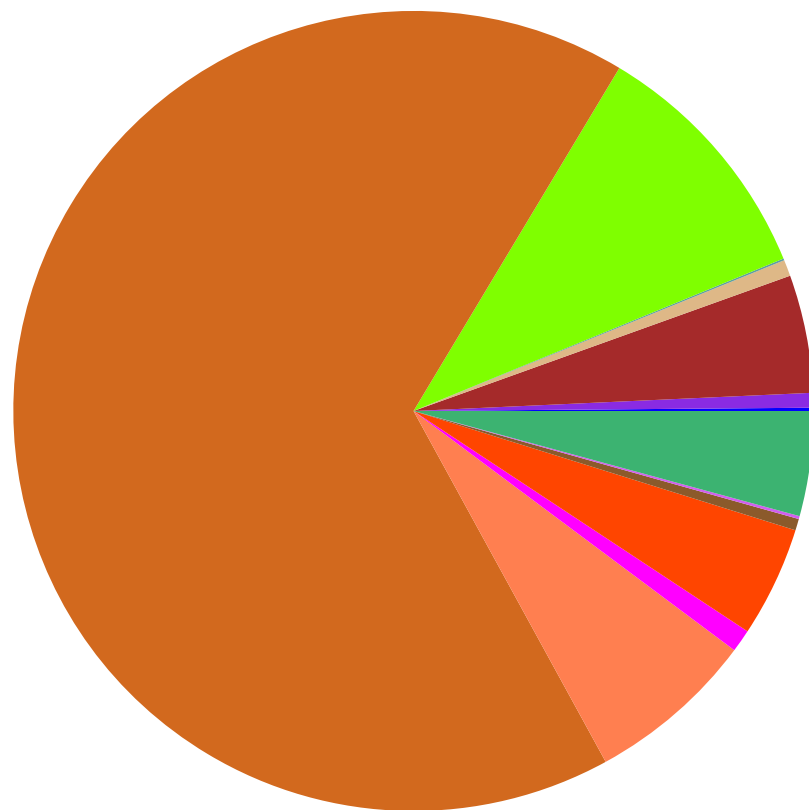

- scRNA (18118)
- intron\_antisense (82165)
- intron\_sense (657628)
- snRNA (90989)
- srpRNA (10021)
- exon\_sense (1404471)
- unann (9187812)
- rRNA (942089)
- snoRNA (126411)
- repeat (616280)
- miRNA (64391)
- exon\_antisense (16467)
- tRNA (584345)
