# Supplementary figures and images for: Effects of Conjugated Linoleic Acid Supplementation on the Expression Profile of miRNAs in Porcine Adipose Tissue
Source: MDPI journal article supplement (doi:10.3390/genes8100271), 2017-10-13

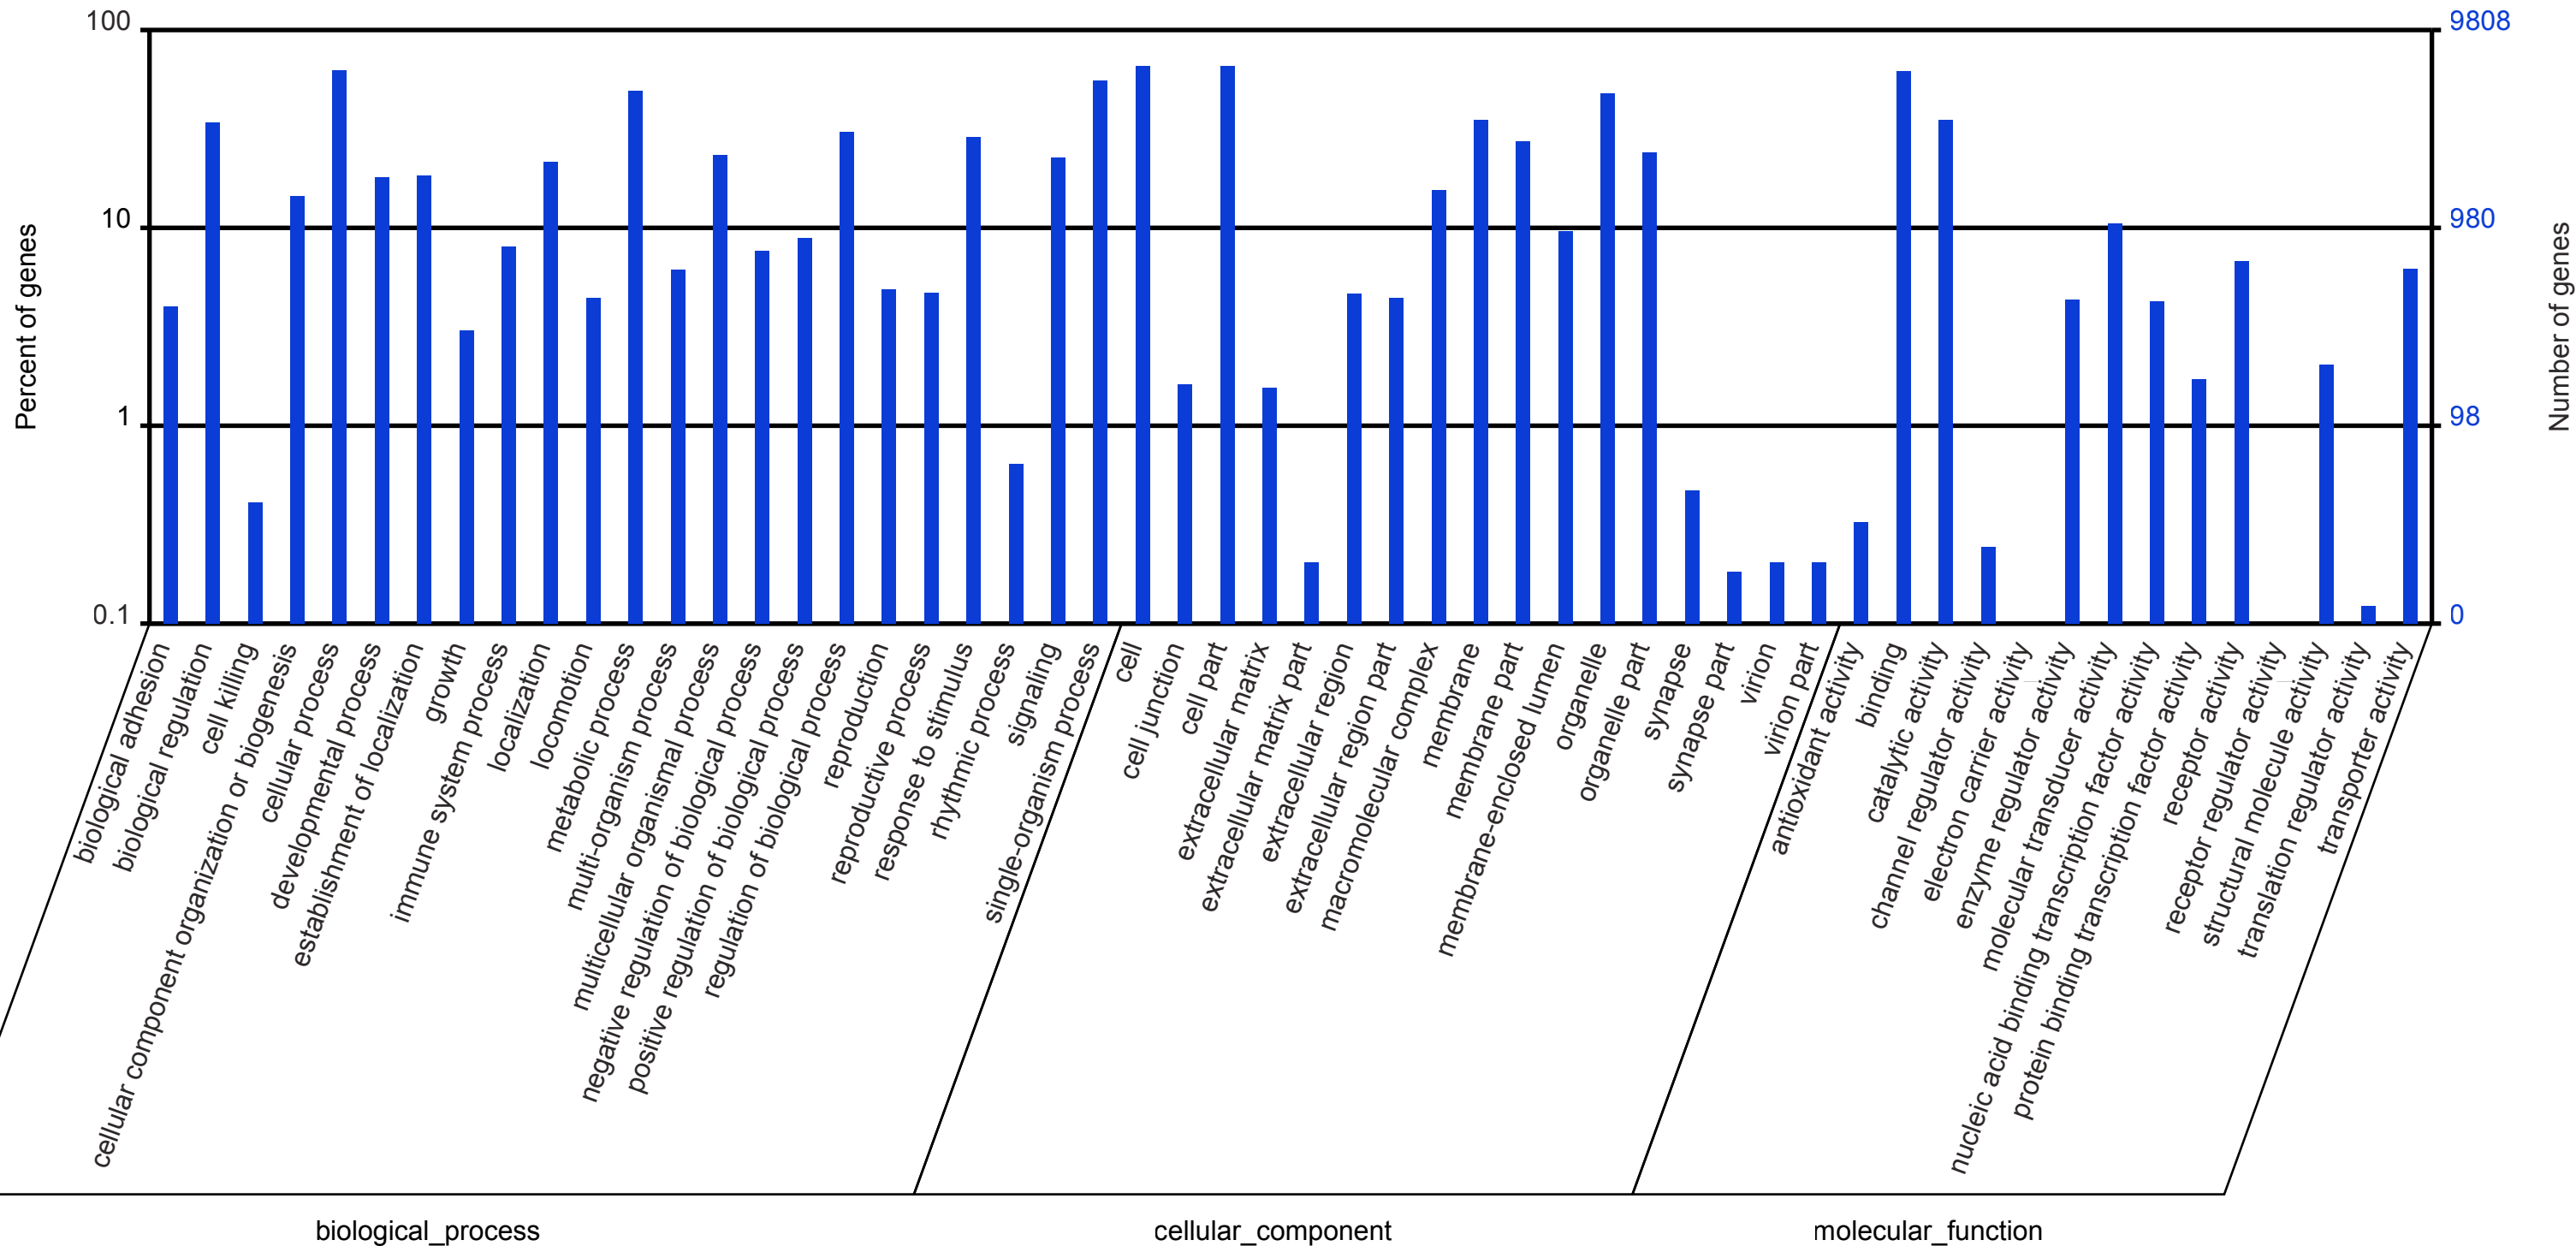

Supplement: s1 [file s1]
